# Supplementary material for: Selenium and Taurine Combination Is Better Than Alone in Protecting Lipopolysaccharide‐Induced Mammary Inflammatory Lesions via Activating PI3K/Akt/mTOR Signaling Pathway by Scavenging Intracellular ROS
Source: Hindawi journal article supplement (doi:10.1155/2021/5048375), 2021-01-01

DAPI

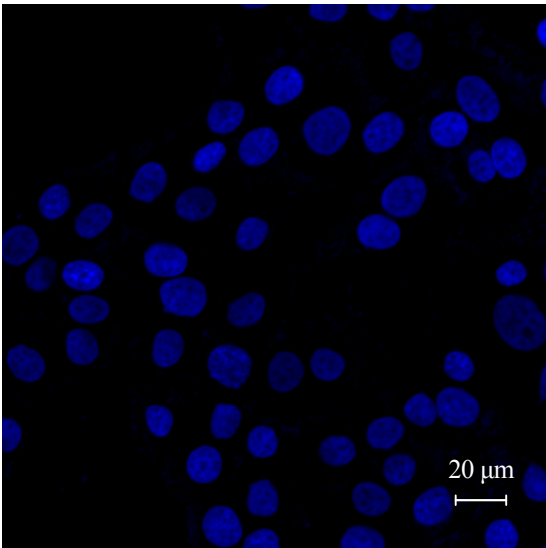

CK-18

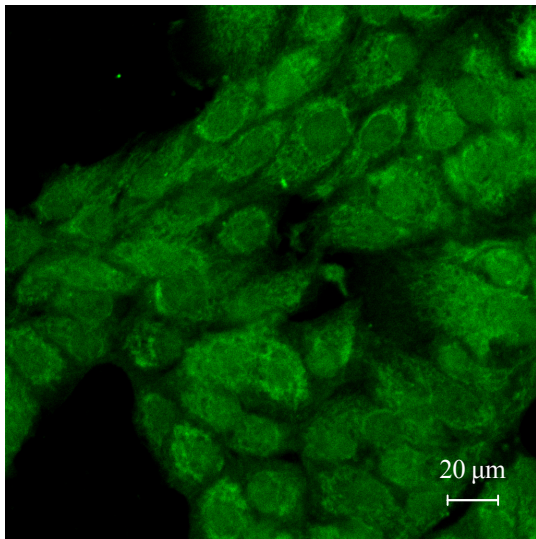

Merged

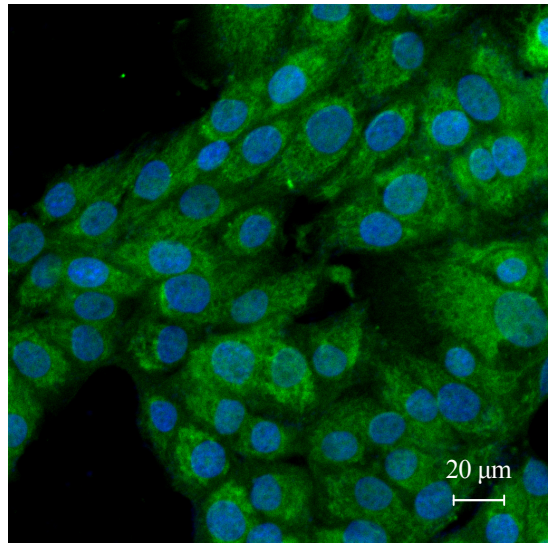

Supplement: f1 [file 5048375.f1.pdf]
